# Supplementary material
Source: publisher site journal article supplement (https://www.dovepress.com/article/218778)
Supplement: Supplementary file 1 [file get_supplementary_file.php]

**Supplemetary materials**


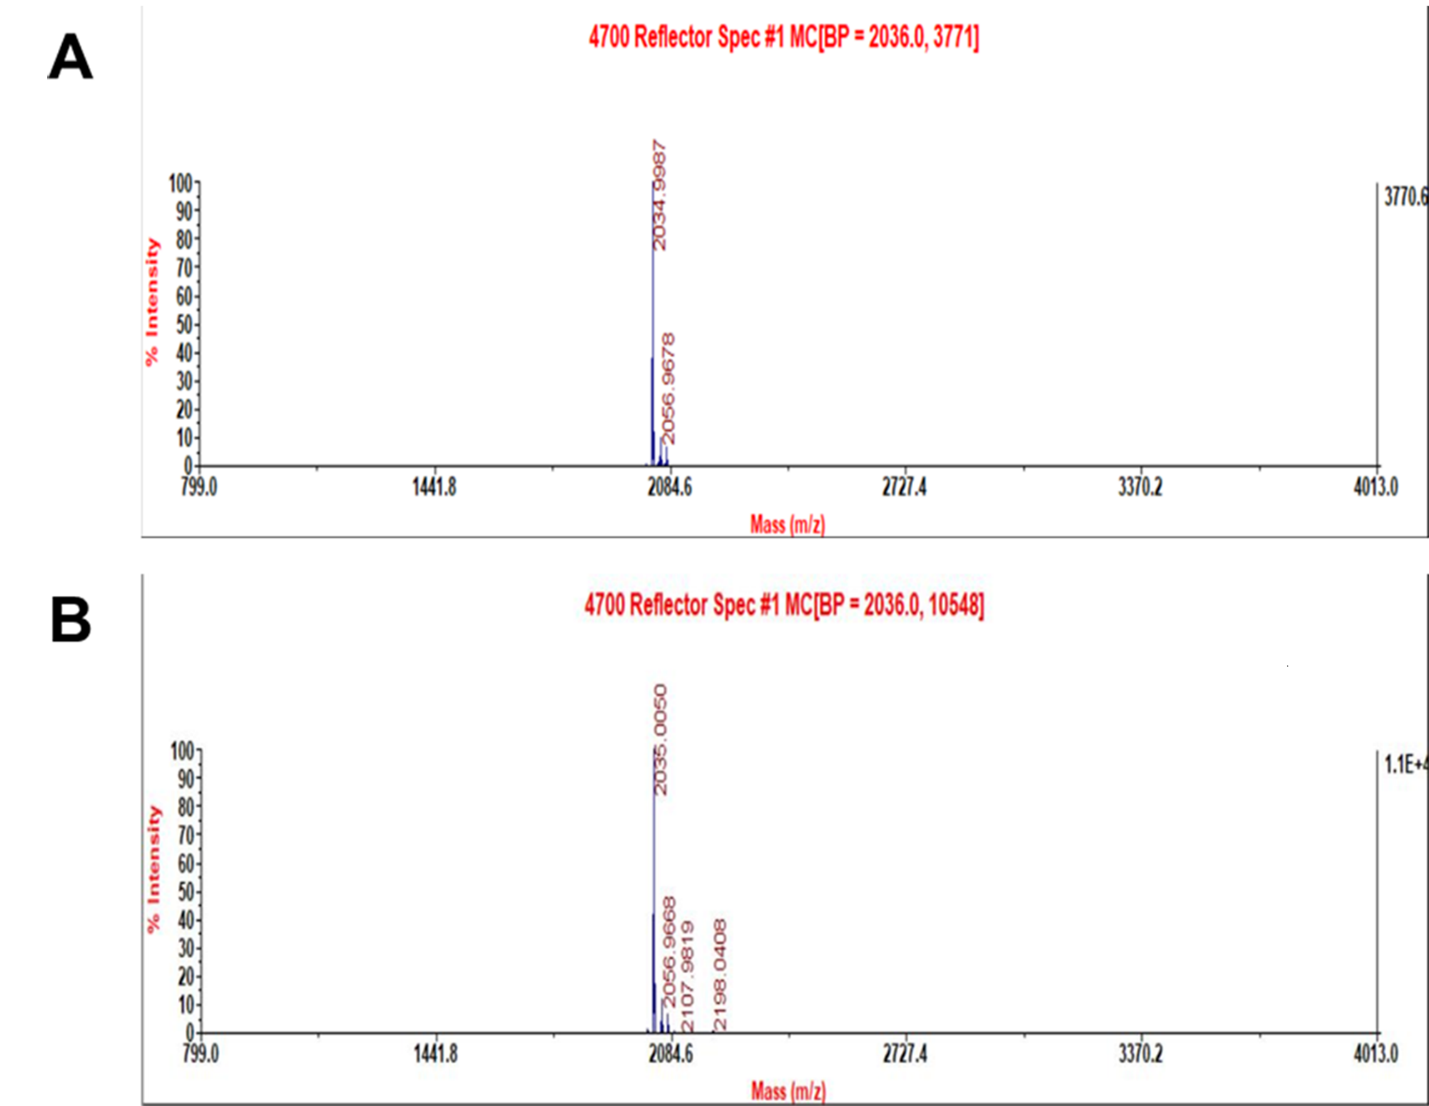


**Figure S1.** Mass spectra of purified peptides. Molecular weight of HPRP-A1 (A) and HPRP-A2 (B) is 2035 Dolton.


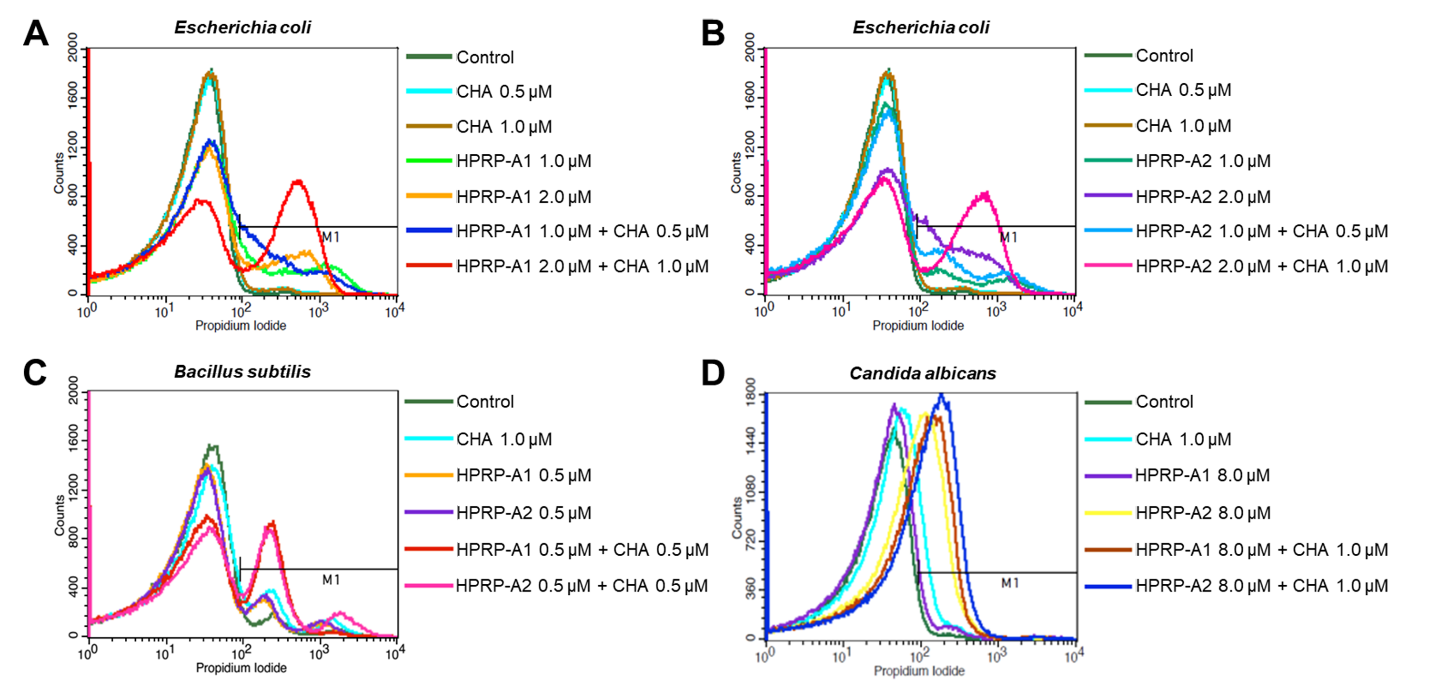


**Figure S2.** FACS Analysis. LB medium (A, B, C)/SD (D) broth medium (Control). (A) HPRP-A1 (1.0 μM) and/or CHA (0.5μM), HPRP-A1 (2.0 μM) and/or CHA (1.0μM) against *E. coli*; (B) HPRP-A2 (1.0 μM) and/or CHA (0.5 μM), HPRP-A1 (2.0 μM) and/or CHA (1.0μM) against *E. coli*; (C) HPRP-A1/HPRP-A2 (0.5μM) and/or CHA (0.5 μM) against *B. subtilis*; (D) HPRP-A1 (8.0 μM), HPRP-A2 (8.0 μM) and/or CHA (1.0 μM) against *C. albicans*. Bacterial or fungal cells were incubated for 1 h at 37 °C, followed by 15 min incubation with PI, and analysis by FACS.


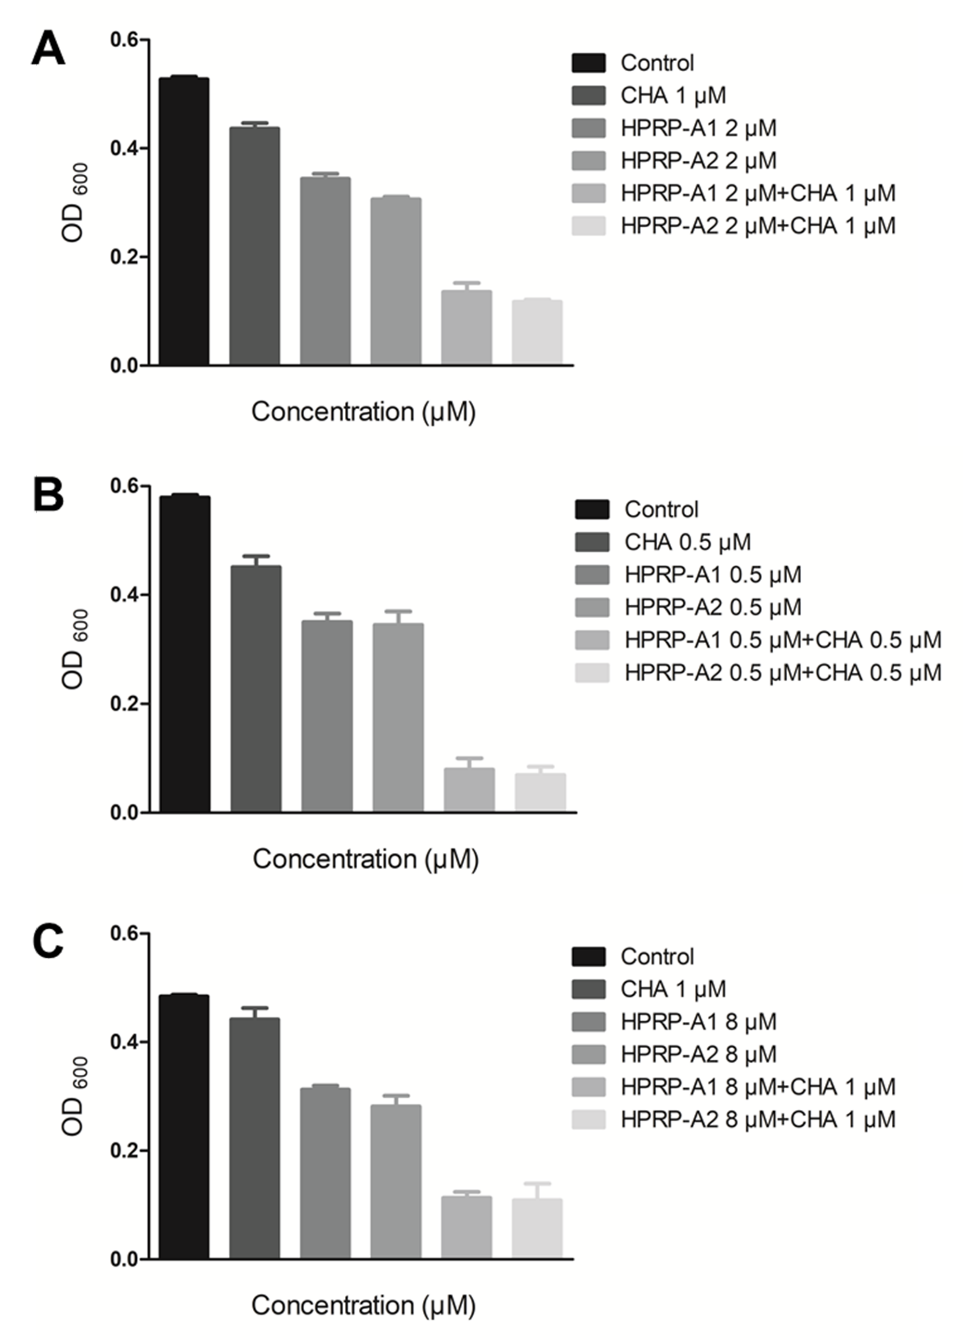


**Figure S3.** Evaluated by turbidity method analysis.Antibacterial effect of HPRP-A1, HPRP-A2 and/or CHA on the growth of (A) *E. coli* ATCC25922, (B)*B. subtilis* ATCC6633, (C) *C.albicans* JLC30364. Bacteria and fungi of incubated with synergistic concentrations of HPRP-A1, HPRP-A2 and CHA were grown overnight at 37 °C or 35 °C in 96-well microtiter plates. Absorbance is optical density (OD) 600.


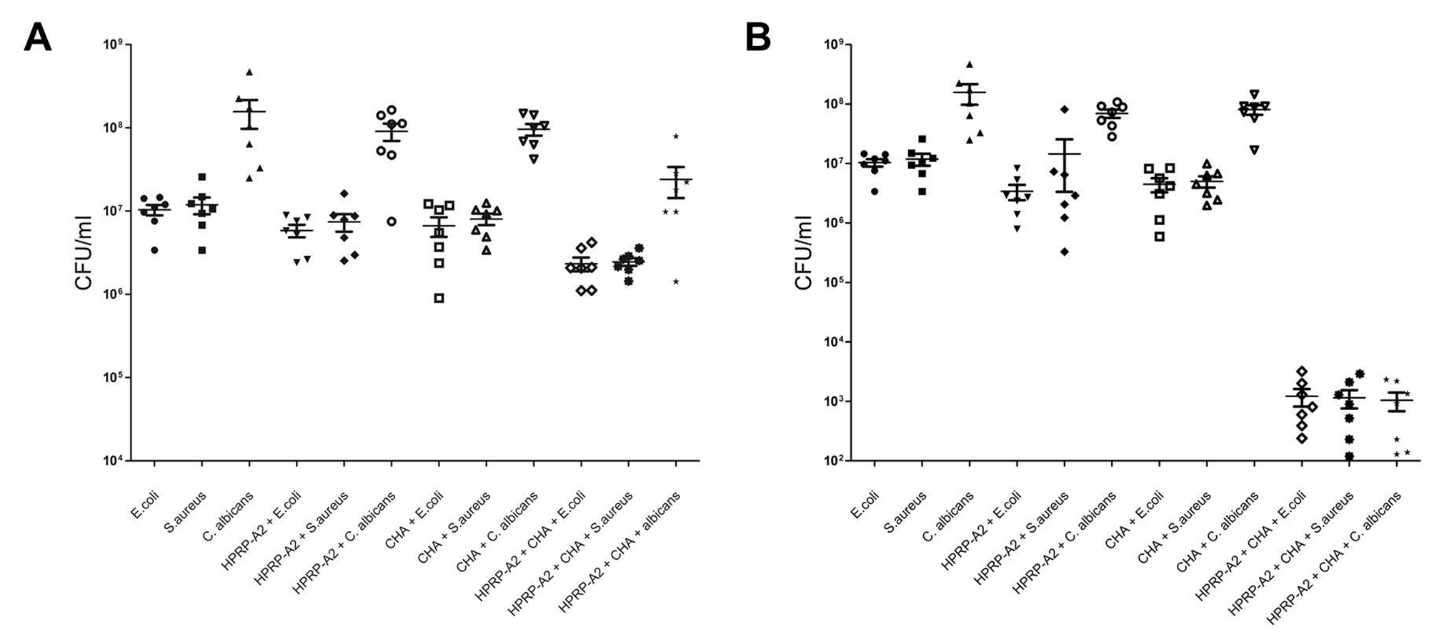


**Figure S4.** **Inhibition of mice and rats’ bacteria. (A)** Low dosage group, HPRP-A2 (0.5 mg/ml) + CHA (0.02 mg/ml) (B) high dosage group, HPRP-A2 (1.0 mg/ml) + CHA (0.3 mg/ml). Statistics of 7 groups, each of the groups treated for 8 days, then the bacterial count was measured by spread plate method. According to the formula: CFUi = CFUc–CFUd, CFUi is the number of bacteria inhibited, CFUd is the number of bacterial colonies in the drug treatment group, CFUc is the number of bacterial colonies in the control group.
